# Supplementary material for: C–C bond cleavage in acetonitrile by copper(ii)–bipyridine complexes and in situ formation of cyano-bridged mixed-valent copper complexes
Source: Royal Society of Chemistry journal article supplement (doi:10.1039/c2dt32281a), 2012-12-04
Supplement: c2dt32281a.pdf [file c2dt32281a.pdf]

# C-C bond cleavage in acetonitrile by copper(II)-bipyridine complexes and *in situ* formation of cyano-bridged mixed-valent copper complexes

Feng Xu, Tao Tao, Kun Zhang, Xiao-Xu Wang, Wei Huang,\* Xiao-Zeng  
You

*State Key Laboratory of Coordination Chemistry, Nanjing National Laboratory of  
Microstructures, School of Chemistry and Chemical Engineering, Nanjing  
University, Nanjing 210093, P. R. China*

## Electronic Supporting Information

**Table ESI1.** Selected bond lengths (Å) and bond angles (°) for copper complexes  
1-12.

| Complex 1               |          |                          |           |
|-------------------------|----------|--------------------------|-----------|
| Cu1-N1                  | 2.014(8) | Cu2-N7                   | 2.064(8)  |
| Cu1-N2                  | 1.998(8) | Cu2-C16                  | 1.894(8)  |
| Cu1-N3                  | 1.980(8) | Cu2-C29                  | 1.892(9)  |
| Cu1-N5                  | 1.981(7) | N5-C16                   | 1.152(11) |
| Cu1-N9                  | 2.081(7) | N8-C28                   | 1.158(16) |
| Cu2-N6                  | 2.090(8) |                          |           |
| Cu1-N5-C16              | 174.7(8) | Cu2-C16-N5               | 167.5(8)  |
| Cu1-N9-C29 <sup>a</sup> | 172.3(7) | Cu2-C29-N9 <sup>b</sup>  | 174.6(8)  |
| Complex 2               |          |                          |           |
| Cu1-N1                  | 2.007(7) | Cu2-N7                   | 2.074(7)  |
| Cu1-N2                  | 2.016(6) | Cu2-C16                  | 1.862(8)  |
| Cu1-N3                  | 1.985(6) | Cu2-C27 <sup>c</sup>     | 1.883(8)  |
| Cu1-N5                  | 1.991(6) | N5-C16                   | 1.171(10) |
| Cu1-N8                  | 2.046(7) | N9-C28                   | 1.110(17) |
| Cu2-N6                  | 2.049(7) |                          |           |
| Cu1-N5-C16              | 175.3(6) | Cu2-C16-N5               | 167.9(7)  |
| Cu1-N8-C27              | 173.1(5) | Cu2 <sup>d</sup> -C27-N8 | 174.8(6)  |

| <b>Complex 3</b> |          |             |           |
|------------------|----------|-------------|-----------|
| Cu1–N1           | 2.010(4) | Cu2–N7      | 2.090(5)  |
| Cu1–N2           | 2.144(4) | Cu2–N8      | 1.999(4)  |
| Cu1–N3           | 2.093(5) | Cu2–N9      | 2.103(5)  |
| Cu1–N4           | 2.006(5) | Cu2–C42     | 1.966(6)  |
| Cu1–C21          | 1.955(7) | N5–C21      | 1.137(10) |
| Cu2–N6           | 1.993(4) | N10–C42     | 1.136(9)  |
| Cu1–C21–N5       | 174.5(7) | Cu2–C42–N10 | 175.4(6)  |
| <b>Complex 4</b> |          |             |           |
| Cu1–N1           | 2.045(3) | Cu2–N6      | 1.999(4)  |
| Cu1–N2           | 1.979(4) | Cu2–N7      | 2.142(3)  |
| Cu1–N3           | 1.976(3) | Cu2–N8      | 2.033(3)  |
| Cu1–N4           | 2.115(3) | Cu2–N9      | 1.982(3)  |
| Cu1–C21          | 1.993(4) | N5–C21      | 1.138(5)  |
| Cu2–N5           | 1.984(4) |             |           |
| Cu1–C21–N5       | 175.8(3) | Cu2–N5–C21  | 177.6(4)  |
| <b>Complex 5</b> |          |             |           |
| Cu1–N1           | 1.978(5) | Cu2–N6      | 2.123(5)  |
| Cu1–N2           | 2.103(4) | Cu2–N7      | 2.065(5)  |
| Cu1–N3           | 2.076(5) | Cu2–N8      | 1.979(5)  |
| Cu1–N4           | 1.971(5) | Cu2–C41     | 1.982(5)  |
| Cu1–N9           | 1.983(5) | N9–C41      | 1.153(7)  |
| Cu2–N5           | 1.976(5) |             |           |
| Cu1–N9–C41       | 176.0(4) | Cu2–C41–N9  | 179.3(4)  |
| <b>Complex 6</b> |          |             |           |
| Cu1–N1           | 2.085(4) | Cu1–N4      | 2.020(5)  |
| Cu1–N2           | 2.012(5) | Cu1–C25     | 1.955(6)  |
| Cu1–N3           | 2.135(5) | N5–C25      | 1.134(8)  |
| Cu1–C25–N5       | 176.0(6) |             |           |
| <b>Complex 7</b> |          |             |           |
| Cu1–N1           | 2.091(3) | Cu1–N4      | 1.995(3)  |
| Cu1–N2           | 1.998(3) | Cu1–C25     | 1.972(4)  |
| Cu1–N3           | 2.105(3) | N5–C25      | 1.145(6)  |
| Cu1–C25–N5       | 176.7(4) |             |           |
| <b>Complex 8</b> |          |             |           |
| Cu1–N1           | 2.054(5) | Cu1–N4      | 1.985(5)  |
| Cu1–N2           | 1.988(5) | Cu1–N5      | 1.975(6)  |
| Cu1–N3           | 2.102(7) | Cu1–C25     | 1.975(6)  |
| <b>Complex 9</b> |          |             |           |
| Cu1–N1           | 2.053(4) | Cu2–N6      | 2.089(5)  |
| Cu1–N2           | 1.984(4) | Cu2–N7      | 2.084(7)  |
| Cu1–N3           | 2.174(4) | Cu2–C25     | 1.922(5)  |
| Cu1–N4           | 1.978(5) | N5–C25      | 1.150(7)  |
| Cu1–N5           | 1.954(5) |             |           |

|                   |           |                     |            |
|-------------------|-----------|---------------------|------------|
| Cu1–N5–C25        | 174.0(5)  | Cu2–C25–N5          | 172.7(5)   |
| <b>Complex 10</b> |           |                     |            |
| Cu1–N1            | 1.985(2)  | Cu1–N4              | 1.984(2)   |
| Cu1–N2            | 2.097(2)  | Cu1–N5              | 2.011(2)   |
| Cu1–N3            | 2.109(3)  |                     |            |
| N1–Cu1–N2         | 79.82(10) | N2–Cu1–N4           | 95.00(10)  |
| N1–Cu1–N3         | 95.07(10) | N2–Cu1–N5           | 133.97(9)  |
| N1–Cu1–N4         | 172.36(9) | N3–Cu1–N4           | 79.65(10)  |
| N1–Cu1–N5         | 94.30(9)  | N3–Cu1–N5           | 131.50(10) |
| N2–Cu1–N3         | 94.53(9)  | N4–Cu1–N5           | 93.35(9)   |
| <b>Complex 11</b> |           |                     |            |
| Cu1–N1            | 2.054(3)  | Cu1–N1 <sup>h</sup> | 2.054(3)   |
| Cu1–N2            | 2.055(3)  | Cu1–N2 <sup>h</sup> | 2.055(3)   |
| <b>Complex 12</b> |           |                     |            |
| Cu1–N1            | 2.047(5)  | Cu1–N3              | 2.050(5)   |
| Cu1–N2            | 2.018(4)  | Cu1–N4              | 2.017(4)   |

Symmetry operator: <sup>a</sup> = 1/2-x, -1/2+y, -1/2+z; <sup>b</sup> = 1/2-x, 1/2+y, 1/2+z; <sup>c</sup> = 1/2-x, 1/2+y, -1/2+z; <sup>d</sup> = 1/2-x, -1/2+y, 1/2+z; <sup>e</sup> = 1-y, -1+x-y, 1/3+z; <sup>f</sup> = 1-y, x-y, 1/3+z; <sup>g</sup> = 1-y, 1+x-y, 1/3+z; <sup>h</sup> = 2-x, y, 1/2-z.

**Table ESI2.** Intermolecular hydrogen bonding interactions (Å, °) in copper complexes **1-4** and **7-12**.

| D–H⋯A       | D–H  | H–A  | D⋯A       | ∠DHA  | Sym. trans         |
|-------------|------|------|-----------|-------|--------------------|
| <b>1</b>    |      |      |           |       |                    |
| O1–H1A⋯N5   | 0.85 | 2.61 | 3.458(12) | 180.0 | 1+x, y, z          |
| O1–H1B⋯F1   | 0.85 | 2.24 | 3.043(13) | 158.0 | 2-x, 1/2+y, 3/2-z  |
| C1–H1⋯F4    | 0.93 | 2.31 | 3.199(9)  | 160.0 | 1-x, 1/2+y, 3/2-z  |
| C8–H8⋯F5    | 0.93 | 2.31 | 3.105(10) | 143.0 | 1+x, y, z          |
| C12–H12⋯F6  | 0.93 | 2.45 | 3.281(10) | 148.0 | 1-x, 1/2+y, 3/2-z  |
| C23–H23⋯F7  | 0.93 | 2.45 | 3.132(11) | 130.0 | 1+x, 3/2-y, -1/2+z |
| C25–H25⋯F4  | 0.93 | 2.52 | 3.438(9)  | 169.0 | 2-x, 1/2+y, 3/2-z  |
| C39–H39⋯F8  | 0.93 | 2.46 | 3.274(12) | 146.0 | x, 3/2-y, -1/2+z   |
| <b>2</b>    |      |      |           |       |                    |
| O1–H1A⋯F11  | 0.85 | 2.01 | 2.831(18) | 161.0 | 1-x, y, 1/2-z      |
| C1–H1⋯F7    | 0.93 | 2.45 | 3.153(6)  | 133.0 | x, -1+y, z         |
| C4–H4⋯F4    | 0.93 | 2.54 | 3.334(8)  | 143.0 | x, -y, -1/2+z      |
| C9–H9⋯F3    | 0.93 | 2.54 | 3.306(8)  | 140.0 | -x, y, 1/2-z       |
| C11–H11⋯F13 | 0.93 | 2.30 | 3.163(17) | 155.0 | 1-x, y, 1/2-z      |
| C14–H14⋯F12 | 0.93 | 2.55 | 3.464(12) | 169.0 | 1-x, -y, 1-z       |
| C17–H17⋯F12 | 0.93 | 2.40 | 3.321(14) | 173.0 | 1-x, -y, 1-z       |
| C19–H19⋯F9  | 0.93 | 2.43 | 3.354(6)  | 173.0 | x, -1+y, z         |

|               |      |      |           |       |                       |
|---------------|------|------|-----------|-------|-----------------------|
| C23–H23…F2    | 0.93 | 2.24 | 3.153(9)  | 169.0 | -x, y, 1/2-z          |
| C25–H25…F3    | 0.93 | 2.49 | 3.362(7)  | 155.0 | x, 1-y, -1/2+z        |
| <b>3</b>      |      |      |           |       |                       |
| N4–H4A…N8     | 0.86 | 2.37 | 3.088(13) | 141.0 | 1/2-x, -1/2+y, 1/2+z  |
| N4–H4B…O6     | 0.86 | 2.29 | 3.116(12) | 160.0 | -x, 1-y, -1/2+z       |
| <b>4</b>      |      |      |           |       |                       |
| N4–H4A…F3     | 0.86 | 2.23 | 3.058(10) | 161.0 | -1/2+x, 1/2-y, z      |
| N4–H4B…N9     | 0.86 | 2.39 | 3.104(12) | 141.0 | 1/2-x, -1/2+y, -1/2+z |
| <b>7</b>      |      |      |           |       |                       |
| N8–H8A…N7     | 0.86 | 2.33 | 3.056(6)  | 142.0 | x, 1/2-y, -1/2+z      |
| N8–H8B…F4'    | 0.86 | 2.54 | 3.353(11) | 158.0 | 1+x, y, z             |
| C23–H23…F1'   | 0.93 | 2.33 | 3.229(9)  | 164.0 | 1-x, -y, 1-z          |
| C30–H30…N6    | 0.93 | 2.48 | 2.804(5)  | 101.0 | 2-x, -y, 1-z          |
| <b>8</b>      |      |      |           |       |                       |
| C13–H13…O4    | 0.93 | 2.40 | 2.92(2)   | 115.0 | 1-x, 1-y, 1-z         |
| <b>9</b>      |      |      |           |       |                       |
| O10–H10D…O7   | 0.85 | 2.45 | 3.24(4)   | 155.0 | 1/2+x, y, 3/2-z       |
| O12–H12A…O11' | 0.86 | 2.43 | 3.22(8)   | 154.0 | 1-x, -y, -z           |
| C16–H16A…O6   | 0.96 | 2.40 | 3.326(15) | 162.0 | 1/2+x, y, 3/2-z       |
| <b>10</b>     |      |      |           |       |                       |
| N6–H6B…O5     | 0.86 | 2.56 | 3.289(6)  | 143.0 | -x, -1/2+y, 1/2-z     |
| C4–H4…O2      | 0.93 | 2.44 | 3.311(5)  | 155.0 | 1-x, -1/2+y, 1/2-z    |
| C13–H13…O7    | 0.93 | 2.56 | 3.307(6)  | 138.0 | -x, -3/2+y, 1/2-z     |
| C21–H21…O5    | 0.93 | 2.53 | 3.314(7)  | 142.0 | -x, -1/2+y, 1/2-z     |
| <b>11</b>     |      |      |           |       |                       |
| C9–H9…F4      | 0.93 | 2.48 | 3.250(5)  | 140.0 | 2-x, 1-y, 1-z         |
| <b>12</b>     |      |      |           |       |                       |
| C2–H2…O3      | 0.93 | 2.57 | 3.483(13) | 169.0 | 1-x, 1-y, -z          |
| C23–H23…O3'   | 0.93 | 2.52 | 3.405(13) | 160.0 | 2-x, 1-y, -z          |
| C28–H28…O4    | 0.93 | 2.53 | 3.457(14) | 178.0 | x, 1+y, z             |
